# Supplementary material
Source: PubMed Central journal article supplement (PMC3682763)
Supplement: mmc1.pdf [file mmc1.pdf]

**American Journal of Human Genetics, Volume 92**

**Supplemental Information**

**Age-Dependent Germline Mosaicism  
of the Most Common Noonan Syndrome Mutation  
Shows the Signature of Germline Selection**

**Song-Ro Yoon, Soo-Kung Choi, Jordan Eboreime, Bruce D. Gelb, Peter Calabrese,  
and Norman Arnheim**

**Supplemental Inventory**

Table S1 (see separate Excel file)

Table S2

Table S3

Table S4

**Table S1. Mutation Frequencies and Number of Genomes in All Testis Pieces**  
See Excel spreadsheet.

**Table S2. Asymmetric and Symmetric Hot Spot Model Results for All Testes**

| Testis                           | Age | Model parameter<br>Mutation rate per<br>cell division | Mx/Av |                        |                    | F<50 (%) |                        |                    |
|----------------------------------|-----|-------------------------------------------------------|-------|------------------------|--------------------|----------|------------------------|--------------------|
|                                  |     |                                                       | Data  | Simulated<br>95% range | p-value            | Data     | Simulated<br>95% range | p-value            |
| <b>Asymmetric hot spot model</b> |     |                                                       |       |                        |                    |          |                        |                    |
| 59056                            | 19  | $5.7 \times 10^{-9}$                                  | 39    | 2 – 14                 | $<10^{-6}$         | 100      | 100 – 100              | 0.50               |
| 63878                            | 21  | $4.6 \times 10^{-8}$                                  | 8     | 1 – 11                 | 0.06               | 99       | 99 – 100               | 0.79               |
| 63205                            | 21  | $1.1 \times 10^{-9}$                                  | 40    | 3 – 15                 | $9 \times 10^{-6}$ | 100      | 100 – 100              | 0.50               |
| 60832                            | 23  | $2.5 \times 10^{-9}$                                  | 20    | 2 – 11                 | 0.003              | 100      | 100 – 100              | 0.50               |
| 62923                            | 36  | $3.1 \times 10^{-7}$                                  | 130   | 1 – 9                  | $<10^{-6}$         | 90       | 0 – 0                  | $<10^{-6}$         |
| 59089                            | 45  | $2.9 \times 10^{-8}$                                  | 31    | 1 – 9                  | $<10^{-6}$         | 93       | 99 – 100               | 1.00               |
| 854-2                            | 54  | $1.4 \times 10^{-6}$                                  | 156   | 1 – 5                  | $<10^{-6}$         | 77       | 0 – 0                  | $<10^{-6}$         |
| 374-1                            | 62  | $2.2 \times 10^{-7}$                                  | 129   | 1 – 7                  | $<10^{-6}$         | 90       | 0 – 0                  | $<10^{-6}$         |
| 374-2                            | 62  | $5.3 \times 10^{-8}$                                  | 62    | 1 – 7                  | $<10^{-6}$         | 94       | 0 – 1                  | $<10^{-6}$         |
| 60891                            | 68  | $4.2 \times 10^{-9}$                                  | 14    | 1 – 5                  | $2 \times 10^{-5}$ | 95       | 100 – 100              | 1.00               |
| 64302                            | 75  | $3.9 \times 10^{-8}$                                  | 17    | 1 – 7                  | $<10^{-6}$         | 90       | 1 – 4                  | $<10^{-6}$         |
| 60954                            | 76  | $7.3 \times 10^{-8}$                                  | 18    | 1 – 7                  | $<10^{-6}$         | 81       | 0 – 0                  | $<10^{-6}$         |
| 60955                            | 76  | $2.3 \times 10^{-10}$                                 | 124   | 3 – 5                  | $<10^{-6}$         | 100      | 100 – 100              | 0.5                |
| 57650                            | 80  | $3.2 \times 10^{-8}$                                  | 7     | 1 – 5                  | 0.02               | 76       | 40 – 54                | $<10^{-6}$         |
| 60507                            | 80  | $9.1 \times 10^{-9}$                                  | 8     | 1 – 4                  | 0.005              | 97       | 99 – 100               | 1.00               |
| <b>Symmetric hot spot model</b>  |     |                                                       |       |                        |                    |          |                        |                    |
| 59056                            | 19  | $5.7 \times 10^{-9}$                                  | 39    | 13 – 42                | 0.10               | 100      | 100 – 100              | 0.50               |
| 63878                            | 21  | $4.6 \times 10^{-8}$                                  | 8     | 4 – 15                 | 0.11               | 99       | 98 – 100               | 0.39               |
| 63205                            | 21  | $1.1 \times 10^{-9}$                                  | 40    | 30 – 114               | 0.84               | 100      | 100 – 100              | 0.50               |
| 60832                            | 23  | $2.5 \times 10^{-9}$                                  | 20    | 20 – 70                | 0.97               | 100      | 100 – 100              | 0.50               |
| 62923                            | 36  | $3.1 \times 10^{-7}$                                  | 130   | 2 – 9                  | $<10^{-6}$         | 90       | 0 – 2                  | $<10^{-6}$         |
| 59089                            | 45  | $2.9 \times 10^{-8}$                                  | 31    | 5 – 13                 | $8 \times 10^{-4}$ | 93       | 84 – 90                | $1 \times 10^{-4}$ |
| 854-2                            | 54  | $1.4 \times 10^{-6}$                                  | 156   | 1 – 5                  | $<10^{-6}$         | 77       | 0 – 0                  | $<10^{-6}$         |
| 374-1                            | 62  | $2.2 \times 10^{-7}$                                  | 129   | 2 – 6                  | $<10^{-6}$         | 90       | 0 – 1                  | $<10^{-6}$         |
| 374-2                            | 62  | $5.3 \times 10^{-8}$                                  | 62    | 4 – 9                  | $<10^{-6}$         | 94       | 47 – 58                | $<10^{-6}$         |
| 60891                            | 68  | $4.2 \times 10^{-9}$                                  | 14    | 14 – 47                | 0.98               | 95       | 96 – 98                | 1.00               |
| 64302                            | 75  | $3.9 \times 10^{-8}$                                  | 17    | 4 – 10                 | 0.004              | 90       | 53 – 64                | $<10^{-6}$         |
| 60954                            | 76  | $7.3 \times 10^{-8}$                                  | 18    | 3 – 8                  | 0.002              | 81       | 21 – 31                | $<10^{-6}$         |
| 60955                            | 76  | $2.3 \times 10^{-10}$                                 | 124   | 57 – 188               | 0.43               | 100      | 99 – 100               | 0.77               |
| 57650                            | 80  | $3.2 \times 10^{-8}$                                  | 7     | 5 – 11                 | 0.31               | 76       | 59 – 69                | $8 \times 10^{-6}$ |
| 60507                            | 80  | $9.1 \times 10^{-9}$                                  | 8     | 9 – 27                 | 0.99               | 97       | 89 – 94                | $4 \times 10^{-6}$ |

**Table S3. Asymmetric and Symmetric Selection Model Results for All Testes**

| Testis                            | Age | Model parameters                |                     | Mx/Av |                     |         | F<50 (%) |                     |         |
|-----------------------------------|-----|---------------------------------|---------------------|-------|---------------------|---------|----------|---------------------|---------|
|                                   |     | Mutation rate per cell division | Selection parameter | Data  | Simulated 95% range | p-value | Data     | Simulated 95% range | p-value |
| <b>Asymmetric selection model</b> |     |                                 |                     |       |                     |         |          |                     |         |
| 59056                             | 19  | $5.6 \times 10^{-10}$           | 0.026               | 39    | 13 – 52             | 0.08    | 100      | 100 – 100           | 0.50    |
| 63878                             | 21  | $4.2 \times 10^{-9}$            | 0.020               | 8     | 4 – 13              | 0.13    | 99       | 99 – 100            | 0.52    |
| 63205                             | 21  | $1.8 \times 10^{-10}$           | 0.016               | 40    | 19 – 68             | 0.27    | 100      | 100 – 100           | 0.50    |
| 60832                             | 23  | $2.7 \times 10^{-10}$           | 0.016               | 20    | 15 – 50             | 0.77    | 100      | 100 – 100           | 0.50    |
| 62923                             | 36  | $3.7 \times 10^{-11}$           | 0.022               | 130   | 37 – 157            | 0.09    | 90       | 90 – 97             | 0.96    |
| 59089                             | 45  | $9.6 \times 10^{-11}$           | 0.011               | 31    | 20 – 72             | 0.64    | 93       | 88 – 94             | 0.10    |
| 854-2                             | 54  | $1.3 \times 10^{-11}$           | 0.015               | 156   | 39 – 171            | 0.06    | 77       | 89 – 97             | 1.00    |
| 374-1                             | 62  | $1.6 \times 10^{-11}$           | 0.011               | 129   | 39 – 164            | 0.12    | 90       | 90 – 97             | 0.97    |
| 374-2                             | 62  | $2.6 \times 10^{-11}$           | 0.0095              | 62    | 33 – 135            | 0.56    | 94       | 90 – 96             | 0.33    |
| 60891                             | 68  | $2.3 \times 10^{-10}$           | 0.0051              | 14    | 8 – 26              | 0.39    | 95       | 98 – 100            | 1.00    |
| 64302                             | 75  | $1.2 \times 10^{-10}$           | 0.010               | 17    | 17 – 59             | 0.97    | 90       | 80 – 88             | 0.003   |
| 60954                             | 76  | $1.2 \times 10^{-10}$           | 0.0105              | 18    | 0 – 61              | 0.96    | 81       | 76 – 85             | 0.38    |
| 60955                             | 76  | $1.1 \times 10^{-11}$           | 0.0079              | 124   | 50 – 178            | 0.28    | 100      | 100 – 100           | 0.50    |
| 57650                             | 80  | $6.1 \times 10^{-10}$           | 0.0095              | 7     | 7 – 24              | 0.94    | 76       | 65 – 75             | 0.01    |
| 60507                             | 80  | $9.6 \times 10^{-10}$           | 0.0083              | 8     | 5 – 19              | 0.40    | 97       | 93 – 97             | 0.02    |
| <b>Symmetric selection model</b>  |     |                                 |                     |       |                     |         |          |                     |         |
| 59056                             | 19  | $4.3 \times 10^{-9}$            | 0.0022              | 39    | 15 – 50             | 0.10    | 100      | 100 – 100           | 0.50    |
| 63878                             | 21  | $3.3 \times 10^{-8}$            | 0.0016              | 8     | 5 – 19              | 0.33    | 99       | 98 – 100            | 0.12    |
| 63205                             | 21  | $1.4 \times 10^{-9}$            | 0.0004              | 40    | 27 – 100            | 0.72    | 100      | 100 – 100           | 0.50    |
| 60832                             | 23  | $2.2 \times 10^{-9}$            | 0.0008              | 20    | 21 – 75             | 0.98    | 100      | 100 – 100           | 0.50    |
| 62923                             | 36  | $5.9 \times 10^{-10}$           | 0.0078              | 130   | 34 – 140            | 0.04    | 90       | 88 – 96             | 0.86    |
| 59089                             | 45  | $3.4 \times 10^{-9}$            | 0.0024              | 31    | 16 – 55             | 0.34    | 93       | 86 – 92             | 0.01    |
| 854-2                             | 54  | $9.2 \times 10^{-11}$           | 0.0064              | 156   | 46 – 190            | 0.15    | 77       | 92 – 99             | 1.00    |
| 374-1                             | 62  | $4.0 \times 10^{-10}$           | 0.0038              | 129   | 38 – 160            | 0.11    | 90       | 90 – 97             | 0.96    |
| 374-2                             | 62  | $7.9 \times 10^{-10}$           | 0.0028              | 62    | 32 – 127            | 0.49    | 94       | 89 – 96             | 0.23    |
| 60891                             | 68  | $7.7 \times 10^{-9}$            | 0.0007              | 14    | 11 – 34             | 0.80    | 95       | 96 – 99             | 0.99    |
| 64302                             | 75  | $6.0 \times 10^{-9}$            | 0.0034              | 17    | 12 – 39             | 0.66    | 90       | 83 – 92             | 0.18    |
| 60954                             | 76  | $3.5 \times 10^{-9}$            | 0.0040              | 18    | 16 – 54             | 0.92    | 81       | 73 – 83             | 0.12    |
| 60955                             | 76  | $2.0 \times 10^{-10}$           | 0.0030              | 124   | 63 – 192            | 0.54    | 100      | 99 – 100            | 0.67    |
| 57650                             | 80  | $6.3 \times 10^{-9}$            | 0.0039              | 7     | 12 – 40             | 1.00    | 76       | 74 – 83             | 0.67    |
| 60507                             | 80  | $2.1 \times 10^{-8}$            | 0.0030              | 8     | 7 – 20              | 0.77    | 97       | 90 – 98             | 0.13    |

**Table S4. General Hot Spot Model to Examine the Symmetric Division Scheme**

| Model parameter q       | Simulated 95% range |          |
|-------------------------|---------------------|----------|
|                         | Mx/Av               | F<50 (%) |
| 0.00 (asymmetric model) | 1 – 7               | 0 – 1    |
| 0.10                    | 2 – 7               | 37 – 48  |
| 0.20                    | 3 – 8               | 43 – 54  |
| 0.30                    | 3 – 8               | 46 – 57  |
| 0.40                    | 4 – 9               | 47 – 58  |
| 0.50 (symmetric model)  | 4 – 9               | 47 – 58  |

In the general hot spot model there are three possibilities: SrAp divide symmetrically to produce two SrAp with probability q, SrAp differentiate thus ending that particular SrAp lineage with probability q (the first two possibilities have to be balanced to keep the number of SrAp approximately constant), and SrAp divide asymmetrically with probability 1-2q. Simulations were made for testis 374-2 with the mutation rate per cell division equal to  $5.3 \times 10^{-8}$  (as in Table 2). Mutation clustering increases with the value of parameter q, but even for the greatest possible value (q = 0.5, symmetric model) the clustering is significantly less than in the testis (Mx/Av = 62, F<50 = 94%).
